# Supplementary material
Source: Research Square preprint supplement (doi:10.21203/rs.3.rs-9387014/v1)
Supplement: Supplementary file [file 90aa615da5f3c5eb0c6c9dd7.pdf]

# Qualisys PAF package: Functional Assessment marker set - Upper body

|  | Name   | Ref. <sup>1</sup> | Location                      | Static (18) | Dyn. (18) |
|--|--------|-------------------|-------------------------------|-------------|-----------|
|  | L_HEAD |                   | On headband, just above ear   | X           | X         |
|  | R_HEAD |                   | On headband, just above ear   | X           | X         |
|  | SGL    | SGL               | On headband, Forehead         | X           | X         |
|  | SME    | SME               | Sternum                       | X           | X         |
|  | TV2    | TV2               | Spine, 2nd Thoracic Vertebra  | X           | X         |
|  | TV12   | TV12              | Spine, 12th Thoracic Vertebra | X           | X         |
|  | L_SAE  | SAE               | Shoulder                      | X           | X         |
|  | L_HLE  | HLE               | Elbow (outside)               | X           | X         |
|  | L_HME  | HME               | Elbow (inside)                | X           | X         |
|  | L_RSP  | RSP               | Wrist (thumb side)            | X           | X         |
|  | L_USP  | USP               | Wrist (pinkie side)           | X           | X         |
|  | L_HM2  | HM2               | Hand (basis of Forefinger)    | X           | X         |
|  | R_SAE  | SAE               | Shoulder                      | X           | X         |
|  | R_HLE  | HLE               | Elbow (outside)               | X           | X         |
|  | R_HME  | HME               | Elbow (inside)                | X           | X         |
|  | R_RSP  | RSP               | Wrist (thumb side)            | X           | X         |
|  | R_USP  | USP               | Wrist (pinkie side)           | X           | X         |
|  | R_HM2  | HM2               | Hand (basis of Forefinger)    | X           | X         |
|  |        |                   |                               |             |           |

<sup>1</sup> Sint Jan, S. Van (2007). Color Atlas of Skeletal Landmark Definitions. Guidelines for Reproducible Manual and Virtual Palpations. Edinburgh: Churchill Livingstone.

# Qualisys PAF package: Functional Assessment marker set - Lower body

| Name    | Ref. <sup>1</sup> | Location                                                 | Static (28) | Dyn. (28) |
|---------|-------------------|----------------------------------------------------------|-------------|-----------|
| L_IAS   | IAS               | Anterior superior iliac spine                            | X           | X         |
| L_IPS   | IPS               | Posterior superior iliac spine                           | X           | X         |
| R_IPS   | IPS               | Posterior superior iliac spine                           | X           | X         |
| R_IAS   | IAS               | Right anterior superior iliac spine                      | X           | X         |
| L_TH1-4 |                   | Cluster                                                  | X           | X         |
| L_FLE   | FLE               | Lateral epicondyle                                       | X           | X         |
| L_FME   | FME               | Medial epicondyle                                        | X           | X         |
| L_SK1-4 |                   | Cluster                                                  | X           | X         |
| L_FAL   | FAL               | Lateral prominence of the lateral malleolus              | X           | X         |
| L_TAM   | TAM               | Medial prominence of the medial malleolus                | X           | X         |
| L_FCC   | FCC               | Aspect of the Achilles tendon insertion on the calcaneus | X           | X         |
| L_LCAL  |                   | Lateral calcaneus                                        | X           | X         |
| L_FM5   | FM5               | Dorsal margin of the fifth metatarsal head               | X           | X         |
| L_PM6   | PM6               | Proximal medial phalanx of the big toe                   | X           | X         |
| L_FM1   | FM1               | Dorsal margin of the first metatarsal head               | X           | X         |
| L_MCAL  |                   | Medial calcaneus                                         | X           | X         |
| R_TH1-4 |                   | Cluster                                                  | X           | X         |
| R_FLE   | FLE               | Lateral epicondyle                                       | X           | X         |
| R_FME   | FME               | Medial epicondyle                                        | X           | X         |
| R_SK1-4 |                   | Cluster                                                  | X           | X         |
| R_FAL   | FAL               | Lateral prominence of the lateral malleolus              | X           | X         |
| R_TAM   | TAM               | Medial prominence of the medial malleolus                | X           | X         |
| R_FCC   | FCC               | Aspect of the Achilles tendon insertion on the calcaneus | X           | X         |
| R_LCAL  |                   | Lateral calcaneus                                        | X           | X         |
| R_FM5   | FM5               | Dorsal margin of the fifth metatarsal head               | X           | X         |
| R_PM6   | PM6               | Dorsal aspect of the second metatarsal head              | X           | X         |
| R_FM1   | FM1               | Dorsal margin of the first metatarsal head               | X           | X         |
| R_MCAL  |                   | Medial calcaneus                                         | X           | X         |

<sup>1</sup> Sint Jan, S. Van (2007). Color Atlas of Skeletal Landmark Definitions. Guidelines for Reproducible Manual and Virtual Palpations. Edinburgh: Churchill Livingstone.

## The final marker points application scheme adopted in the research

|            |        |            |       |
|------------|--------|------------|-------|
|            | L_HEAD |            |       |
|            | R_HEAD |            |       |
|            | SGL    |            | L_IAS |
|            | CV7    |            | L_IPS |
|            | L_SIA  |            | L_IS  |
|            | R_SIA  |            | R_IAS |
|            | JN     |            | R_IPS |
|            | TV10   |            | R_IS  |
|            | L_SAE  |            | L_TH  |
|            | L_HUM1 |            | L_FLE |
|            | L_HUM2 |            | L_FME |
|            | L_HUM3 |            | R_TH  |
| Upper body | L_HLE  | lower body | R_FLE |
|            | L_HME  |            | R_FME |
|            | L_RSP  |            | L_SK  |
|            | L_USP  |            | L_FAL |
|            | L_HM2  |            | L_TAM |
|            | R_SAE  |            | R_SK  |
|            | R_HUM1 |            | R_FAL |
|            | R_HUM2 |            | R_TAM |
|            | R_HUM3 |            | L_FT  |
|            | R_HLE  |            | L_FCC |
|            | R_HME  |            | R_FT  |
|            | R_RSP  |            | R_FCC |
|            | R_USP  |            |       |
|            | R_HM2  |            |       |
